# Supplementary material
Source: PubMed Central journal article supplement (PMC7583668)
Supplement: NIHMS1589974-supplement-Supplemental_Material.pdf [file NIHMS1589974-supplement-Supplemental_Material.pdf]

## Supplemental Materials

**Title:** Nexilin is necessary for TATS organization in adult cardiomyocytes.

**Authors:** Simone Spinozzi\*, Canzhao Liu\*, Ze'e Chen, Wei Feng, Lungfeng Zhang, Kunfu Ouyang, Sylvia M. Evans and Ju Chen#.

\*Equally contributing authors. #Corresponding author

| Primers        | 5' -3'                            | Application     |
|----------------|-----------------------------------|-----------------|
| NX-F           | 5' -TCAAAGGGAAGGTCATTAATAATTC-3'  | Mice genotyping |
| NX-R           | 5' -TGATGATGATGATGTTGCTAAGTG-3'   | Mice genotyping |
| Cre-F          | 5' -GTTCGCAAGAACCTGATGGACA-3'     | Mice genotyping |
| Cre-R          | 5' -CTAGAGCCTGTTTTGCACGTTC-3'     | Mice genotyping |
| Nppa-F         | 5' -GATAGATGAAGGCAGGAAGCCGC-3'    | qRT-PCR         |
| Nppa-R         | 5' -AGGATTGGAGCCCAGAGTGGACTAGG-3' | qRT-PCR         |
| Nppb-F         | 5' -TGTTTCTGCTTTTCCTTTATCTGTC-3'  | qRT-PCR         |
| Nppb-R         | 5' -CTCCGACTTTTCTCTTATCAGCTC-3'   | qRT-PCR         |
| Collagen 1a1-F | 5' -TCACCAAACCTCAGAAGATGTAGGA-3'  | qRT-PCR         |
| Collagen 1a1-R | 5' -GACCAGGAGGACCAGGAAG-3'        | qRT-PCR         |
| Collagen 3a1-F | 5' -ACAGCAGTCCAACGTAGATGAAT-3'    | qRT-PCR         |
| Collagen 3a1-R | 5' -TCACAGATTATGTCATCGCAAAG-3'    | qRT-PCR         |
| 18S-F          | 5' -GGAAGGGCACCACCAGGAGT-3'       | qRT-PCR         |
| 18S-R          | 5' -TGCAGCCCCGGACATCTAAG-3'       | qRT-PCR         |

**Table S1. List of primers used.**

| Antibody | Source, Cat. No        | Antibody  | Source, Cat. No      |
|----------|------------------------|-----------|----------------------|
| RyR2     | ENZO, ALX-804-016-R100 | DHPR      | abcam, ab2864        |
| JPH2     | Santa Cruz, sc-51313   | Casq1     | Santa Cruz, sc-28274 |
| Casq2    | Santa Cruz, sc-390999  | SERCA2    | Santa Cruz, sc-73022 |
| Cacna1c  | ACC-003                | Myomesin  | DSHB, B4             |
| GAPDH    | Santa Cruz, sc-32233   | a-actinin | Sigma-Aldrich, A7811 |

**Table S2. List of antibodies used.**

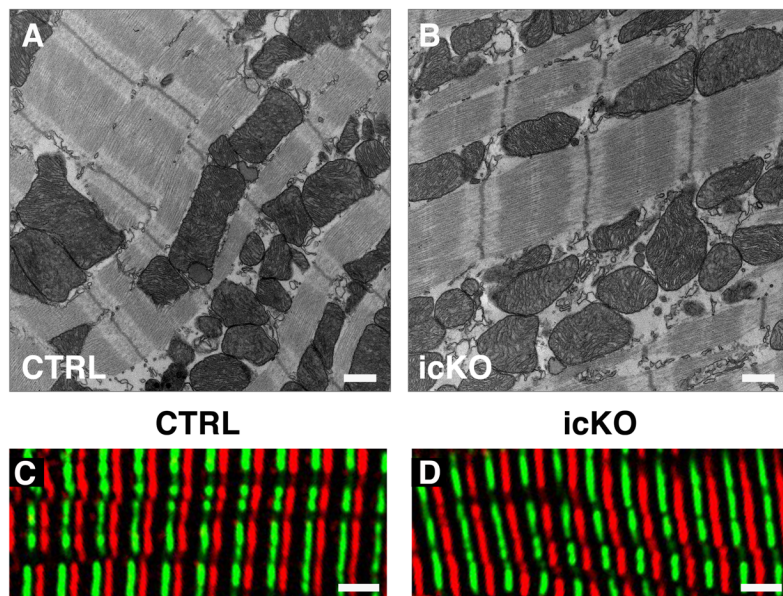

**Figure S1. icKO of NEXN in adult hearts does not alter sarcomere structure.**

(A, B) Electron microscopy representative images from CTRL and icKO mouse hearts, showing no alteration of the sarcomere. Scale bars 500nm (C, D) Confocal microscopy representative images from CTRL and icKO mouse hearts, staining for  $\alpha$ -actinin in green and for myomesin in red. Scale bars 2 $\mu$ m.

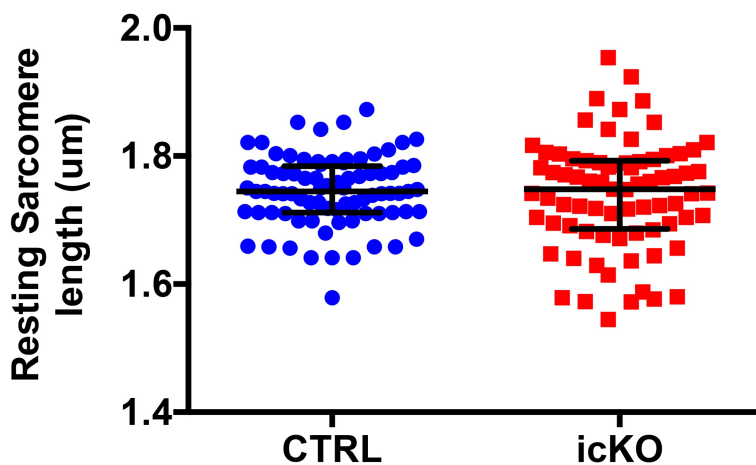

**Figure S2. Sarcomere length.**

Graph representing sarcomere length quantification. Results show no significant difference in resting sarcomere length between icKO and CTRL cardiomyocytes.

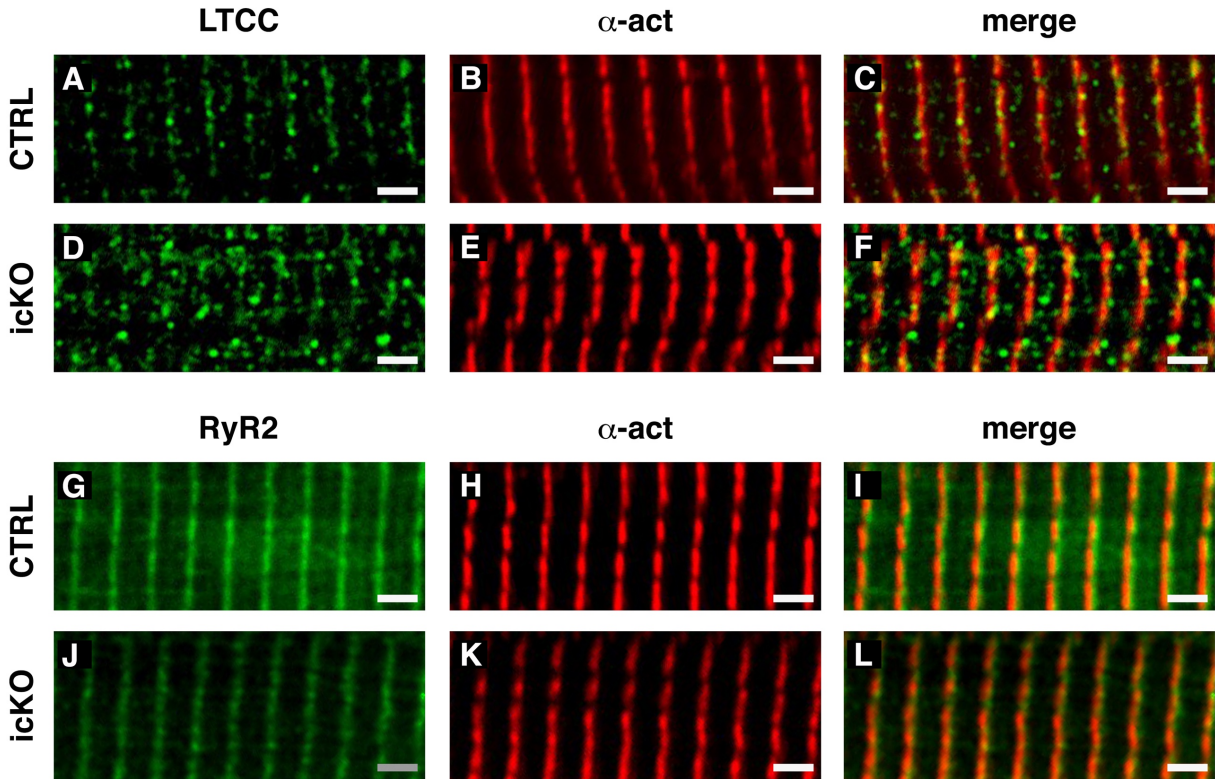

**Figure S3. LTCC and RYR localization pattern.**

Representative confocal images showing localization of LTCC and RYR in icKO and CTRL cardiomyocytes counterstained with  $\alpha$ -actinin (C, F, I, L). LTCC (A, D) and RYR (G, J) in green and  $\alpha$ -actinin (B, E, H, K) in red. Scale bars 2 $\mu$ m.
